# Supplementary material for: Evaluating the impact of varying expired carbon monoxide thresholds on smoking relapse identification: insights from the E3 trial on e-cigarette efficacy for smoking cessation
Source: HighWire-hosted journal article supplement (doi:10.1136/bmjopen-2022-071099), 2023-10-01

Prell, C. et al.

## **Carbon Monoxide Thresholds for Validating Self-Report as a Measure of Smoking Status in Clinical Trials**

### Supplement 1 Online Content

| Content                                                                                                                                                  | Page(s) |
|----------------------------------------------------------------------------------------------------------------------------------------------------------|---------|
| eTable 1: Receiver Operator Characteristic (ROC) Curve Values by Treatment Group                                                                         | 2-3     |
| eTable 2: Receiver Operator Characteristic (ROC) Curve Values by Household Smoking Status                                                                | 4       |
| eTable 3: Receiver Operator Characteristic (ROC) Curve Values Weighted by Visits per Participant                                                         | 5       |
| eTable 4: Comparison of AUC Between Treatment Groups                                                                                                     | 6       |
| eTable 5: Comparison of AUC Between Household Smoking Habits                                                                                             | 7       |
| eFigure 1: Selection of E3 Trial Participants for Inclusion in Expired Carbon Monoxide Sub-study                                                         | 8       |
| eFigure 2: Receiver Operator Characteristic (ROC) Curve for Expired Carbon Monoxide Versus Self-Reported Cigarette Use.                                  | 9       |
| eFigure 3: Receiver Operator Characteristic (ROC) Curve for Expired Carbon Monoxide Concentration Against Self-Reported Cigarette Use by Treatment Group | 10-12   |

Prell, C. et al.

eTable 1. Receiver Operator Characteristic (ROC) Curve Values by Treatment Group<sup>a,b,c</sup>

| ECO Value            | Self-Reported Non-Smokers, ECO ≥ x ppm | Self-Reported Non-Smokers, ECO < x ppm | Self-Reported Smokers, ECO ≥ x ppm | Self-Reported Smokers ECO < x ppm | Sensitivity | Specificity | PPV | NPV | LR+  | LR-  | AUC  |
|----------------------|----------------------------------------|----------------------------------------|------------------------------------|-----------------------------------|-------------|-------------|-----|-----|------|------|------|
| Active <sup>c</sup>  |                                        |                                        |                                    |                                   |             |             |     |     |      |      |      |
| 12 ppm               | 6                                      | 66                                     | 127                                | 104                               | 55%         | 92%         | 95% | 39% | 6.6  | 0.49 | 0.73 |
| 11 ppm               | 6                                      | 66                                     | 141                                | 90                                | 61%         | 92%         | 96% | 42% | 7.3  | 0.43 | 0.76 |
| 10 ppm               | 6                                      | 66                                     | 154                                | 77                                | 67%         | 92%         | 96% | 46% | 8.0  | 0.36 | 0.79 |
| 9 ppm                | 7                                      | 65                                     | 162                                | 69                                | 70%         | 90%         | 96% | 49% | 7.2  | 0.33 | 0.80 |
| 8 ppm                | 7                                      | 65                                     | 170                                | 61                                | 74%         | 90%         | 96% | 52% | 7.6  | 0.29 | 0.82 |
| 7 ppm                | 11                                     | 61                                     | 179                                | 52                                | 77%         | 85%         | 94% | 54% | 5.1  | 0.27 | 0.81 |
| 6 ppm                | 13                                     | 59                                     | 184                                | 47                                | 80%         | 82%         | 93% | 56% | 4.4  | 0.25 | 0.81 |
| 5 ppm                | 16                                     | 56                                     | 188                                | 43                                | 81%         | 78%         | 92% | 57% | 3.7  | 0.24 | 0.80 |
| 4 ppm                | 21                                     | 51                                     | 195                                | 36                                | 84%         | 71%         | 90% | 59% | 2.9  | 0.22 | 0.78 |
| 3 ppm                | 23                                     | 49                                     | 201                                | 30                                | 87%         | 68%         | 90% | 62% | 2.7  | 0.19 | 0.78 |
| 2 ppm                | 27                                     | 45                                     | 204                                | 27                                | 88%         | 63%         | 88% | 63% | 2.4  | 0.19 | 0.75 |
| Placebo <sup>c</sup> |                                        |                                        |                                    |                                   |             |             |     |     |      |      |      |
| 12 ppm               | 1                                      | 56                                     | 131                                | 85                                | 61%         | 98%         | 99% | 40% | 34.6 | 0.40 | 0.79 |
| 11 ppm               | 1                                      | 56                                     | 155                                | 61                                | 72%         | 98%         | 99% | 48% | 40.9 | 0.29 | 0.85 |
| 10 ppm               | 1                                      | 56                                     | 161                                | 55                                | 75%         | 98%         | 99% | 50% | 42.5 | 0.26 | 0.86 |
| 9 ppm                | 4                                      | 53                                     | 170                                | 46                                | 79%         | 93%         | 98% | 54% | 11.2 | 0.23 | 0.86 |
| 8 ppm                | 5                                      | 52                                     | 174                                | 42                                | 81%         | 91%         | 97% | 55% | 9.2  | 0.21 | 0.86 |
| 7 ppm                | 7                                      | 50                                     | 182                                | 34                                | 84%         | 88%         | 96% | 60% | 6.9  | 0.18 | 0.86 |
| 6 ppm                | 8                                      | 49                                     | 185                                | 31                                | 86%         | 86%         | 96% | 61% | 6.1  | 0.17 | 0.86 |
| 5 ppm                | 12                                     | 45                                     | 187                                | 29                                | 87%         | 79%         | 94% | 61% | 4.1  | 0.17 | 0.83 |
| 4 ppm                | 17                                     | 40                                     | 189                                | 27                                | 88%         | 70%         | 92% | 60% | 2.9  | 0.18 | 0.79 |
| 3 ppm                | 20                                     | 37                                     | 193                                | 23                                | 89%         | 65%         | 91% | 62% | 2.5  | 0.16 | 0.77 |
| 2 ppm                | 23                                     | 34                                     | 198                                | 18                                | 92%         | 60%         | 90% | 65% | 2.3  | 0.14 | 0.76 |
| Control <sup>c</sup> |                                        |                                        |                                    |                                   |             |             |     |     |      |      |      |
| 12 ppm               | 2                                      | 26                                     | 108                                | 54                                | 67%         | 93%         | 98% | 33% | 9.3  | 0.36 | 0.80 |
| 11 ppm               | 2                                      | 26                                     | 124                                | 38                                | 77%         | 93%         | 98% | 41% | 10.7 | 0.25 | 0.85 |
| 10 ppm               | 3                                      | 25                                     | 128                                | 34                                | 79%         | 89%         | 98% | 42% | 7.4  | 0.24 | 0.84 |
| 9 ppm                | 3                                      | 25                                     | 131                                | 31                                | 81%         | 89%         | 98% | 45% | 7.5  | 0.21 | 0.85 |
| 8 ppm                | 3                                      | 25                                     | 134                                | 28                                | 83%         | 89%         | 98% | 47% | 7.7  | 0.19 | 0.86 |
| 7 ppm                | 3                                      | 25                                     | 138                                | 24                                | 85%         | 89%         | 98% | 51% | 8.0  | 0.17 | 0.87 |
| 6 ppm                | 4                                      | 24                                     | 140                                | 22                                | 86%         | 86%         | 97% | 52% | 6.0  | 0.16 | 0.86 |
| 5 ppm                | 6                                      | 22                                     | 144                                | 18                                | 89%         | 79%         | 96% | 55% | 4.1  | 0.14 | 0.84 |

Prell, C. et al.

|       |    |    |     |    |     |     |     |     |     |      |      |
|-------|----|----|-----|----|-----|-----|-----|-----|-----|------|------|
| 4 ppm | 10 | 18 | 149 | 13 | 92% | 64% | 94% | 58% | 2.6 | 0.12 | 0.78 |
| 3 ppm | 12 | 16 | 151 | 11 | 93% | 57% | 93% | 59% | 2.2 | 0.12 | 0.75 |
| 2 ppm | 16 | 12 | 152 | 10 | 94% | 43% | 90% | 55% | 1.6 | 0.14 | 0.68 |

<sup>a</sup> Abbreviations: EC = E-Cigarettes; Sens = Sensitivity; Spec = Specificity; PPV = Positive Predictive Value; NPV = Negative Predictive Value; LR+ = Positive Likelihood Ratio; LR- = Negative Likelihood Ratio; AUC = Area Under the Curve

<sup>b</sup> Values for Sensitivity, Specificity, PPV, and NPV are all associated with 95% Confidence Intervals

<sup>c</sup> Active = Participants in nicotine-EC arm; Placebo = Participants in non-nicotine-EC arm; Control = Participants who received counseling only

Prell, C. et al.

**eTable 2. Receiver Operator Characteristic (ROC) Curve Values by Household Smoking Status<sup>a,b,c</sup>**

| ECO Value                          | Self-Reported Non-Smokers, ECO ≥ x ppm | Self-Reported Non-Smokers, ECO < x ppm | Self-Reported Smokers, ECO ≥ x ppm | Self-Reported Smokers, ECO < x ppm | Sensitivity | Specificity | PPV | NPV | LR+  | LR-  | AUC  |
|------------------------------------|----------------------------------------|----------------------------------------|------------------------------------|------------------------------------|-------------|-------------|-----|-----|------|------|------|
| <b>Other Smoker<sup>c</sup></b>    |                                        |                                        |                                    |                                    |             |             |     |     |      |      |      |
| 12 ppm                             | 2                                      | 34                                     | 116                                | 77                                 | 60%         | 94%         | 98% | 31% | 10.8 | 0.42 | 0.77 |
| 11 ppm                             | 2                                      | 34                                     | 137                                | 56                                 | 71%         | 94%         | 99% | 38% | 12.8 | 0.31 | 0.83 |
| 10 ppm                             | 3                                      | 33                                     | 146                                | 47                                 | 76%         | 92%         | 98% | 41% | 9.1  | 0.27 | 0.84 |
| 9 ppm                              | 4                                      | 32                                     | 154                                | 39                                 | 80%         | 89%         | 97% | 45% | 7.2  | 0.23 | 0.84 |
| 8 ppm                              | 4                                      | 32                                     | 159                                | 34                                 | 82%         | 89%         | 98% | 48% | 7.4  | 0.20 | 0.86 |
| 7 ppm                              | 7                                      | 29                                     | 161                                | 32                                 | 83%         | 81%         | 96% | 48% | 4.3  | 0.21 | 0.82 |
| 6 ppm                              | 7                                      | 29                                     | 165                                | 28                                 | 85%         | 81%         | 96% | 51% | 4.4  | 0.18 | 0.83 |
| 5 ppm                              | 11                                     | 25                                     | 166                                | 27                                 | 86%         | 69%         | 94% | 48% | 2.8  | 0.20 | 0.77 |
| 4 ppm                              | 13                                     | 23                                     | 175                                | 18                                 | 91%         | 64%         | 93% | 56% | 2.5  | 0.15 | 0.77 |
| 3 ppm                              | 15                                     | 21                                     | 180                                | 13                                 | 93%         | 58%         | 92% | 62% | 2.2  | 0.12 | 0.76 |
| 2 ppm                              | 16                                     | 20                                     | 182                                | 11                                 | 94%         | 56%         | 92% | 65% | 2.1  | 0.10 | 0.75 |
| <b>No Other Smoker<sup>c</sup></b> |                                        |                                        |                                    |                                    |             |             |     |     |      |      |      |
| 12 ppm                             | 7                                      | 114                                    | 250                                | 166                                | 60%         | 94%         | 97% | 41% | 10.4 | 0.42 | 0.77 |
| 11 ppm                             | 7                                      | 114                                    | 283                                | 133                                | 68%         | 94%         | 98% | 46% | 11.8 | 0.34 | 0.81 |
| 10 ppm                             | 7                                      | 114                                    | 297                                | 119                                | 71%         | 94%         | 98% | 49% | 12.3 | 0.30 | 0.83 |
| 9 ppm                              | 10                                     | 111                                    | 309                                | 107                                | 74%         | 92%         | 97% | 51% | 9.0  | 0.28 | 0.83 |
| 8 ppm                              | 11                                     | 110                                    | 319                                | 97                                 | 77%         | 91%         | 97% | 53% | 8.4  | 0.26 | 0.84 |
| 7 ppm                              | 14                                     | 107                                    | 338                                | 78                                 | 81%         | 88%         | 96% | 58% | 7.0  | 0.21 | 0.84 |
| 6 ppm                              | 18                                     | 103                                    | 344                                | 72                                 | 83%         | 85%         | 95% | 59% | 5.6  | 0.20 | 0.84 |
| 5 ppm                              | 23                                     | 98                                     | 353                                | 63                                 | 85%         | 81%         | 94% | 61% | 4.5  | 0.19 | 0.83 |
| 4 ppm                              | 35                                     | 86                                     | 358                                | 58                                 | 86%         | 71%         | 91% | 60% | 3.0  | 0.20 | 0.79 |
| 3 ppm                              | 40                                     | 81                                     | 365                                | 51                                 | 88%         | 67%         | 90% | 61% | 2.7  | 0.18 | 0.77 |
| 2 ppm                              | 50                                     | 71                                     | 372                                | 44                                 | 89%         | 59%         | 88% | 62% | 2.2  | 0.18 | 0.74 |

<sup>a</sup> Abbreviations: EC = E-Cigarettes; Sens = Sensitivity; Spec = Specificity; PPV = Positive Predictive Value; NPV = Negative Predictive Value; LR+ = Positive Likelihood Ratio; LR- = Negative Likelihood Ratio; AUC = Area Under the Curve

<sup>b</sup> Values for Sensitivity, Specificity, PPV, and NPV are all associated with 95% Confidence Intervals

<sup>c</sup> Other Smoker = Participants had at least one other smoker in their primary household; No Other Smoker = Participants had no other smoker in their primary household

Prell, C. et al.

**eTable 3. Receiver Operator Characteristic (ROC) Curve Values Weighted by Visits per Participant<sup>a,b</sup>**

| ECO Value | Self-Reported Non-Smokers, ECO ≥ x ppm | Self-Reported Non-Smokers, ECO < x ppm | Self-Reported Smokers, ECO ≥ x ppm | Self-Reported Smokers ECO < x ppm | Sensitivity | Specificity | PPV | NPV | LR+ | LR-  | AUC  | κ (95% CI)       |
|-----------|----------------------------------------|----------------------------------------|------------------------------------|-----------------------------------|-------------|-------------|-----|-----|-----|------|------|------------------|
| 12 ppm    | 4.3                                    |                                        |                                    |                                   |             |             |     |     |     |      |      |                  |
|           |                                        | 54.3                                   | 143.7                              | 95.7                              | 60%         | 93%         | 97% | 36% | 8.1 | 0.43 | 0.76 | 0.35 (0.30,0.40) |
| 11 ppm    | 4.3                                    |                                        |                                    |                                   |             |             |     |     |     |      |      |                  |
|           |                                        | 54.3                                   | 166                                | 73.3                              | 69%         | 93%         | 97% | 43% | 9.4 | 0.33 | 0.81 | 0.44 (0.39,0.50) |
| 10 ppm    | 5.3                                    |                                        |                                    |                                   |             |             |     |     |     |      |      |                  |
|           |                                        | 5.3                                    | 175.3                              | 64                                | 73%         | 91%         | 97% | 45% | 8.1 | 0.29 | 0.82 | 0.48 (0.43,0.54) |
| 9 ppm     | 6.7                                    |                                        |                                    |                                   |             |             |     |     |     |      |      |                  |
|           |                                        | 52                                     | 183.8                              | 55.5                              | 77%         | 89%         | 97% | 48% | 6.8 | 0.26 | 0.83 | 0.51 (0.45,0.57) |
| 8 ppm     | 7.0                                    |                                        |                                    |                                   |             |             |     |     |     |      |      |                  |
|           |                                        | 51.7                                   | 189.3                              | 50                                | 79%         | 88%         | 96% | 51% | 6.6 | 0.24 | 0.84 | 0.54 (0.48,0.60) |
| 7 ppm     | 9.2                                    |                                        |                                    |                                   |             |             |     |     |     |      |      |                  |
|           |                                        | 49.5                                   | 198.3                              | 41                                | 83%         | 84%         | 96% | 55% | 5.3 | 0.20 | 0.83 | 0.57 (0.50,0.63) |
| 6 ppm     | 10.7                                   |                                        |                                    |                                   |             |             |     |     |     |      |      |                  |
|           |                                        | 48                                     | 203                                | 36.3                              | 85%         | 82%         | 95% | 57% | 4.7 | 0.19 | 0.81 | 0.57 (0.51,0.64) |
| 5 ppm     | 14.2                                   |                                        |                                    |                                   |             |             |     |     |     |      |      |                  |
|           |                                        | 44.5                                   | 206.7                              | 32.7                              | 86%         | 76%         | 94% | 58% | 3.6 | 0.18 | 0.78 | 0.56 (0.49,0.63) |
| 4 ppm     | 19.3                                   |                                        |                                    |                                   |             |             |     |     |     |      |      |                  |
|           |                                        | 39.3                                   | 211.5                              | 27.8                              | 88%         | 67%         | 92% | 59% | 2.7 | 0.17 | 0.77 | 0.53 (0.46,0.61) |
| 3 ppm     | 21.8                                   |                                        |                                    |                                   |             |             |     |     |     |      |      |                  |
|           |                                        | 36.8                                   | 216.3                              | 23                                | 90%         | 63%         | 91% | 62% | 2.4 | 0.15 | 0.74 | 0.53 (0.46,0.61) |
| 2 ppm     | 26.2                                   |                                        |                                    |                                   |             |             |     |     |     |      |      |                  |
|           |                                        | 32.5                                   | 219.5                              | 19.8                              | 92%         | 55%         | 89% | 62% | 2.1 | 0.15 | 0.70 | 0.50 (0.43,0.58) |

<sup>a</sup> Abbreviations: EC = E-Cigarettes; Sens = Sensitivity; Spec = Specificity; PPV = Positive Predictive Value; NPV = Negative Predictive Value; LR+ = Positive Likelihood Ratio; LR- = Negative Likelihood Ratio; AUC = Area Under the Curve

<sup>b</sup> Values for Sensitivity, Specificity, PPV, and NPV are all associated with 95% Confidence Intervals

Prell, C. et al.

**eTable 4. Comparison of AUC Between Treatment Groups<sup>a,\*,\*\*</sup>**

| ECO Value | AUC (CI) Nicotine | AUC (CI) No Nicotine | AUC (CI) Counseling alone | Difference** AUC Nicotine / No Nicotine (CI, 95%) | Prob* Nicotine / No Nicotine | Difference** AUC Nicotine / Counseling alone (CI, 95%) | Prob* Nicotine / Counseling alone |
|-----------|-------------------|----------------------|---------------------------|---------------------------------------------------|------------------------------|--------------------------------------------------------|-----------------------------------|
| 12 ppm    | 0.73 (0.69; 0.78) | 0.79 (0.76; 0.83)    | 0.80 (0.74; 0.86)         | -0.06 (-0.117; 0.00008)                           | 0.05                         | -0.064 (-0.133; 0.013)                                 | 0.114                             |
| 11 ppm    | 0.76 (0.72; 0.81) | 0.85 (0.82; 0.88)    | 0.85 (0.79; 0.91)         | -0.086 (-0.142; -0.027)                           | 0.002                        | -0.083 (-0.152; -0.007)                                | 0.026                             |
| 10 ppm    | 0.79 (0.75; 0.84) | 0.86 (0.83; 0.90)    | 0.84 (0.78; 0.91)         | -0.072 (-0.128; -0.016)                           | 0.012                        | -0.05 (-0.124; 0.032)                                  | 0.234                             |
| 9 ppm     | 0.80 (0.76; 0.85) | 0.86 (0.82; 0.90)    | 0.85 (0.78; 0.92)         | -0.056 (-0.114; 0.003)                            | 0.062                        | -0.049 (-0.123; 0.03)                                  | 0.232                             |
| 8 ppm     | 0.82 (0.77; 0.86) | 0.86 (0.81; 0.90)    | 0.86 (0.79; 0.93)         | -0.04 (-0.1; 0.019)                               | 0.222                        | -0.042 (-0.115; 0.039)                                 | 0.316                             |
| 7 ppm     | 0.81 (0.76; 0.86) | 0.86 (0.81; 0.91)    | 0.87 (0.81; 0.94)         | -0.049 (-0.121; 0.019)                            | 0.158                        | -0.063 (-0.14; 0.02)                                   | 0.138                             |
| 6 ppm     | 0.81 (0.76; 0.86) | 0.86 (0.81; 0.91)    | 0.86 (0.79; 0.93)         | -0.05 (-0.124; 0.02)                              | 0.166                        | -0.054 (-0.135; 0.034)                                 | 0.238                             |
| 5 ppm     | 0.80 (0.74; 0.85) | 0.83 (0.77; 0.89)    | 0.84 (0.76; 0.92)         | -0.031 (-0.109; 0.041)                            | 0.46                         | -0.042 (-0.134; 0.057)                                 | 0.39                              |
| 4 ppm     | 0.78 (0.72; 0.83) | 0.79 (0.72; 0.85)    | 0.78 (0.69; 0.87)         | -0.011 (-0.1; 0.077)                              | 0.822                        | -0.006 (-0.114; 0.103)                                 | 0.954                             |
| 3 ppm     | 0.78 (0.72; 0.83) | 0.77 (0.71; 0.84)    | 0.75 (0.66; 0.85)         | 0.004 (-0.083; 0.093)                             | 0.928                        | 0.023 (-0.089; 0.134)                                  | 0.664                             |
| 2 ppm     | 0.75 (0.69; 0.81) | 0.76 (0.69; 0.82)    | 0.68 (0.59; 0.78)         | -0.002 (-0.088; 0.089)                            | 0.936                        | 0.07 (-0.048; 0.179)                                   | 0.226                             |

<sup>a</sup> Abbreviations: CI = 95% Confidence Interval; AUC = Area Under the Curve; Prob = Probability; Nicotine = E-cigarette containing nicotine; No Nicotine = E-cigarette without nicotine; Counseling alone = No E-cigarette

\*By bootstrap with 1,000 simulations

\*\* By bootstrap with 1,000 simulations : Difference=mean of the 1,000 differences between AUC1-AUC2; Confidence interval calculated with 2.5 and 97.5 percentile of the 1,000 AUC differences.

Prell, C. et al.

**eTable 5. Comparison of AUC Between Household Smoking Habits<sup>a,\*,\*\*</sup>**

| ECO Value | AUC (CI) Other Household Smoker | AUC (CI) No Household Smoker | Difference** AUC (CI, 95 %) | Prob* |
|-----------|---------------------------------|------------------------------|-----------------------------|-------|
| 12 ppm    | 0.77 (0.72; 0.82)               | 0.77 (0.74; 0.80)            | 0.002 (-0.056; 0.064)       | 0.94  |
| 11 ppm    | 0.83 (0.78; 0.88)               | 0.81 (0.78; 0.84)            | 0.017 (-0.042; 0.073)       | 0.574 |
| 10 ppm    | 0.84 (0.78; 0.89)               | 0.83 (0.8; 0.86)             | 0.01 (-0.053; 0.071)        | 0.734 |
| 9 ppm     | 0.84 (0.78; 0.90)               | 0.83 (0.8; 0.86)             | 0.015 (-0.058; 0.079)       | 0.66  |
| 8 ppm     | 0.86 (0.8; 0.91)                | 0.84 (0.81; 0.87)            | 0.02 (-0.052; 0.082)        | 0.556 |
| 7 ppm     | 0.82 (0.75; 0.89)               | 0.85 (0.81; 0.88)            | -0.027 (-0.117; 0.053)      | 0.53  |
| 6 ppm     | 0.83 (0.76; 0.90)               | 0.84 (0.8; 0.88)             | -0.007 (-0.097; 0.073)      | 0.864 |
| 5 ppm     | 0.78 (0.70; 0.86)               | 0.83 (0.79; 0.87)            | -0.051 (-0.14; 0.042)       | 0.288 |
| 4 ppm     | 0.77 (0.69; 0.85)               | 0.79 (0.74; 0.83)            | -0.012 (-0.105; 0.091)      | 0.758 |
| 3 ppm     | 0.76 (0.67; 0.84)               | 0.77 (0.73; 0.82)            | -0.015 (-0.104; 0.086)      | 0.754 |
| 2 ppm     | 0.75 (0.67; 0.83)               | 0.74 (0.69; 0.79)            | 0.01 (-0.089; 0.111)        | 0.884 |

<sup>a</sup> Abbreviations: CI = 95% Confidence Interval; AUC = Area Under the Curve; Prob = Probability  
\*By bootstrap with 1,000 simulations  
\*\* By bootstrap with 1,000 simulations : Difference=mean of the 1,000 differences between AUC1-AUC2; Confidence interval calculated with 2.5 and 97.5 percentile of the 1,000 AUC differences.

Prell, C. et al.

**eFigure 1. Selection of E3 Trial Participants for Inclusion in Expired Carbon Monoxide Sub-study.** Participants and data points included for analysis from the “Evaluating the Efficacy of E-Cigarette use for Smoking Cessation” (E3) Trial. Of the 376 participants who were randomized, only 298 participants provided at least one paired measurement of self-reported smoking status and corresponding expired carbon monoxide (ECO) level for inclusion in the analyses. The unit of analysis was participant visit, for which participants could contribute up to three measures. A total of 766 paired measures were used in the analyses.

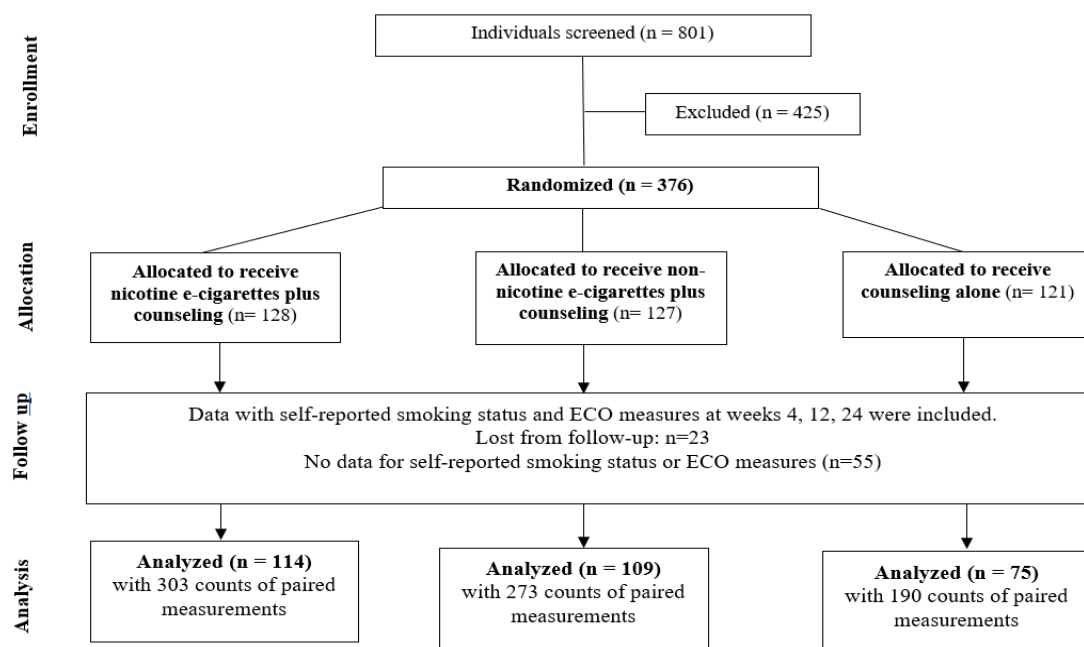



Prell, C. et al.

**eFigure 2. Receiver Operator Characteristic (ROC) Curve for Expired Carbon Monoxide Versus Self-Reported Cigarette Use.**

For the expired carbon monoxide (ECO) threshold  $\geq 8$  ppm and  $\geq 6$  ppm, the area-under-the-curve (AUC) calculated was 0.84, indicating that the ECO can discriminate between smokers and non-smokers at these levels. For ECO  $\geq 10$  ppm, AUC = 0.83.

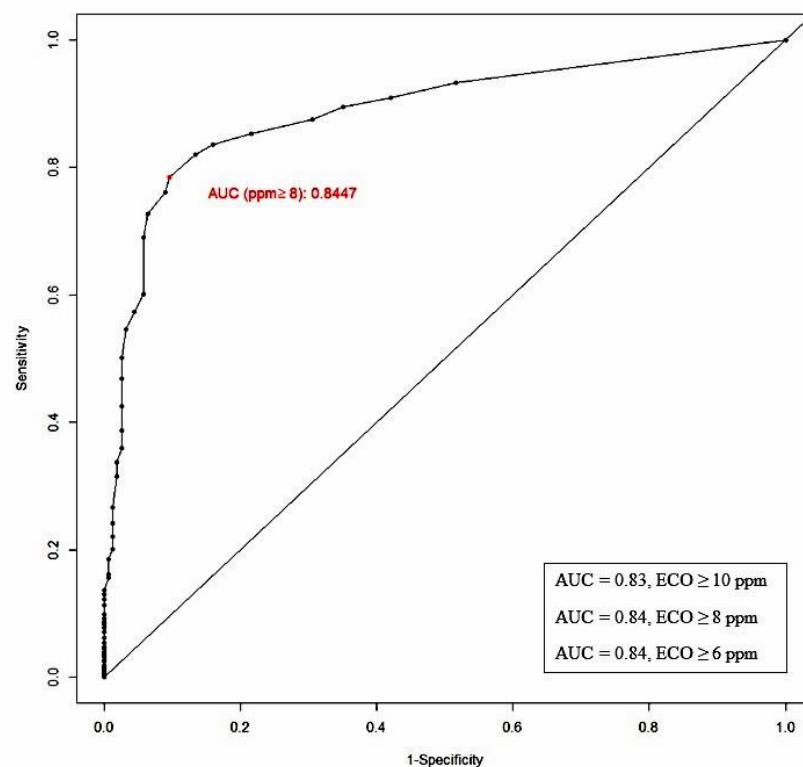

Prell, C. et al.

**eFigure 3: Receiver Operator Characteristic (ROC) Curve for Expired Carbon Monoxide Concentration Against Self-Reported Cigarette Use by Treatment Group**

**eFigure 3a. Receiver Operator Characteristic (ROC) Curves for Nicotine E-Cigarette plus Counseling Group**

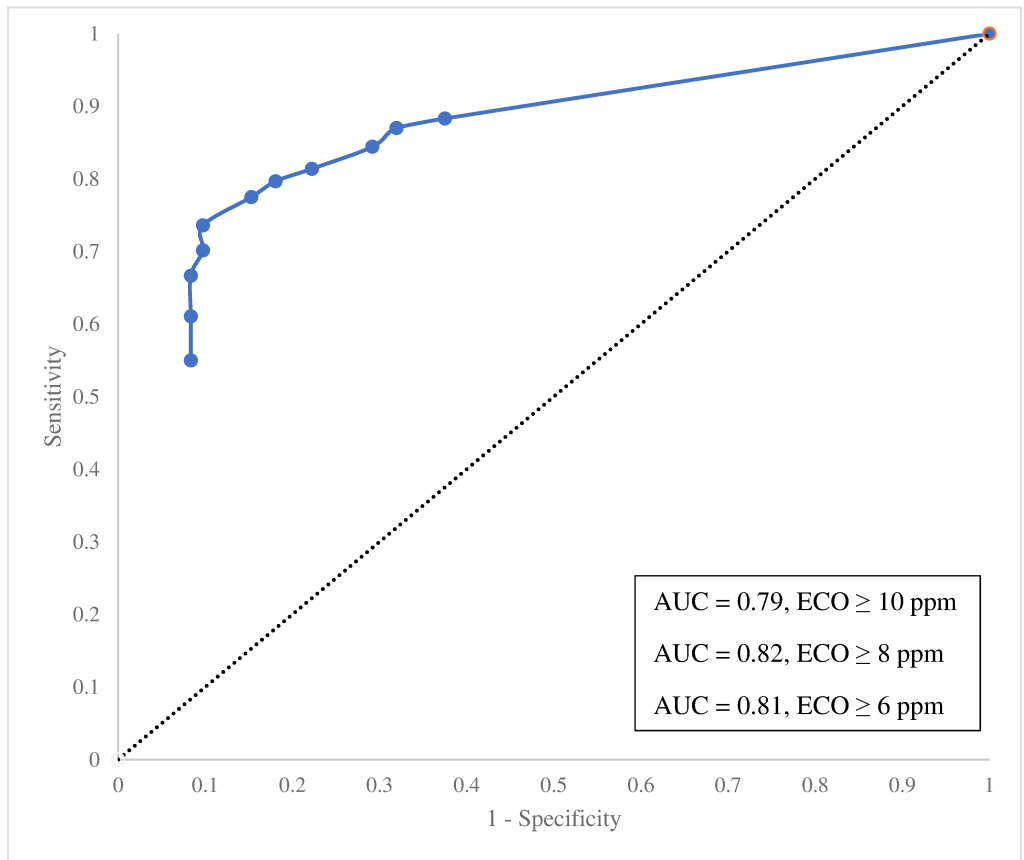

Prell, C. et al.

**eFigure 3b. Receiver Operator Characteristic (ROC) Curves for Non-Nicotine E-Cigarette plus Counseling Group**

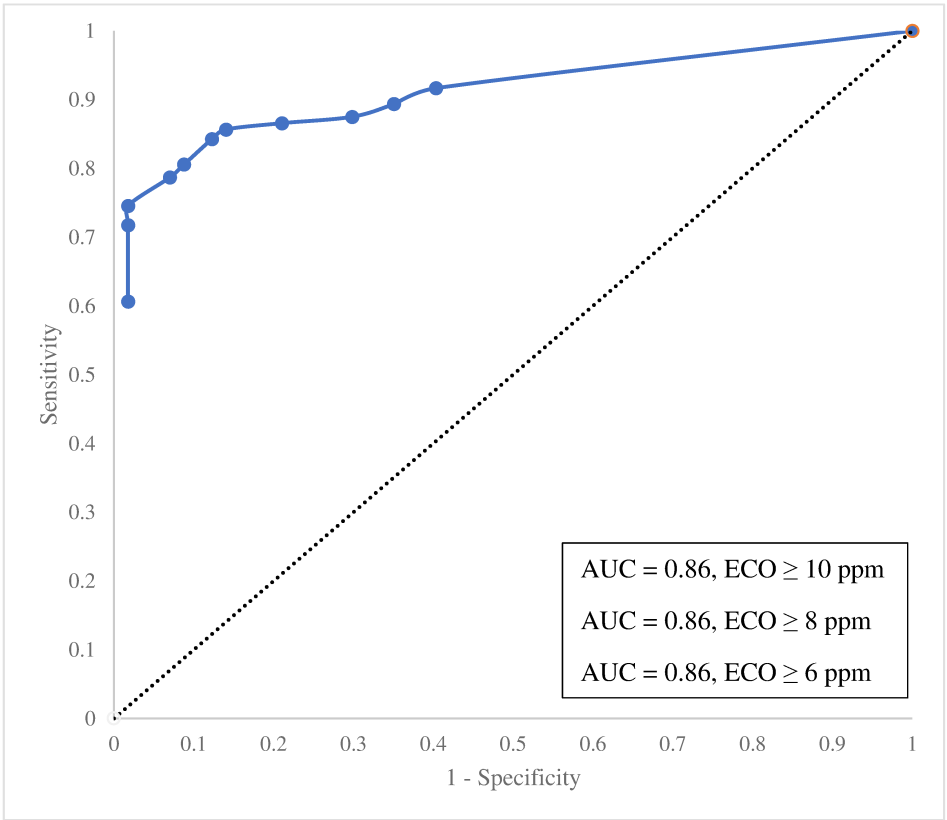

Prell, C. et al.

**eFigure 3c. Receiver Operator Characteristic (ROC) Curves for Counseling Alone Group**

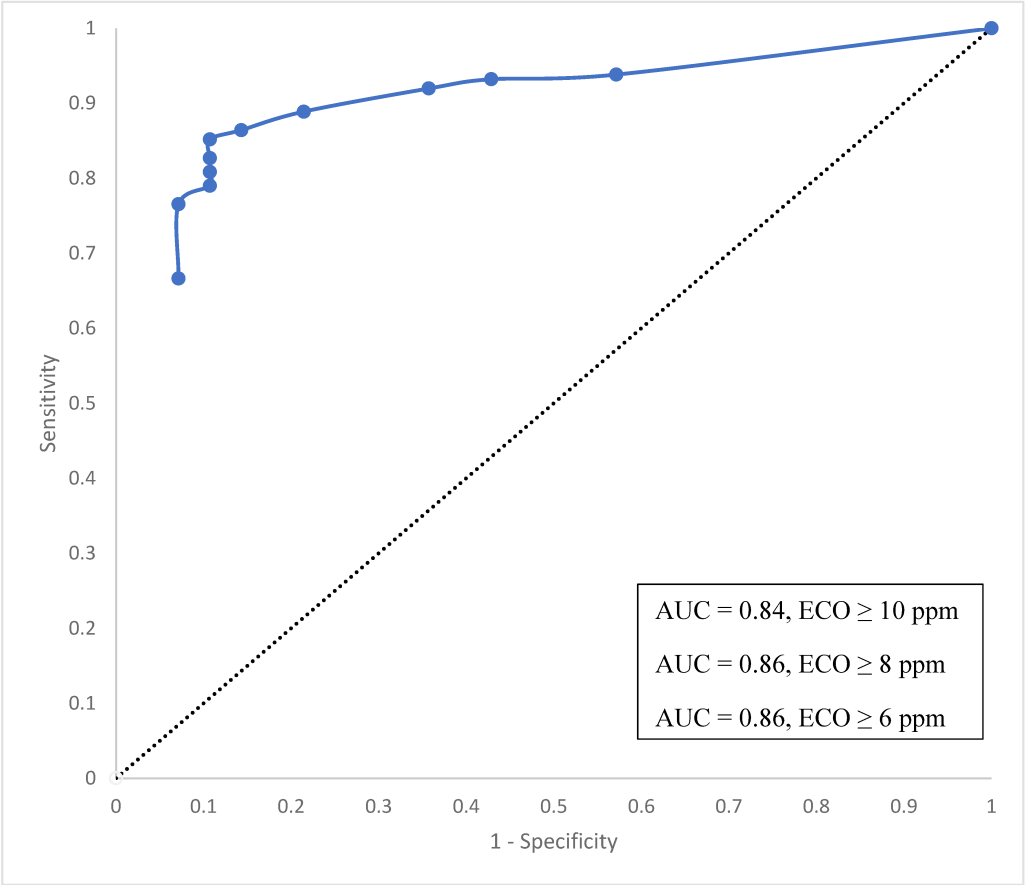

Supplement: bmjopen-2022-071099supp001_data_supplement.pdf [file bmjopen-2022-071099supp001_data_supplement.pdf]
